# Supplementary material for: TractaViewer: a genome-wide tool for preliminary assessment of therapeutic target druggability
Source: Oxford University Press journal article supplement (doi:10.1093/bioinformatics/btz270), 2019-04-23
Supplement: bioinformatics_35_21_4509_s1.pdf [file bioinformatics_35_21_4509_s1.pdf]

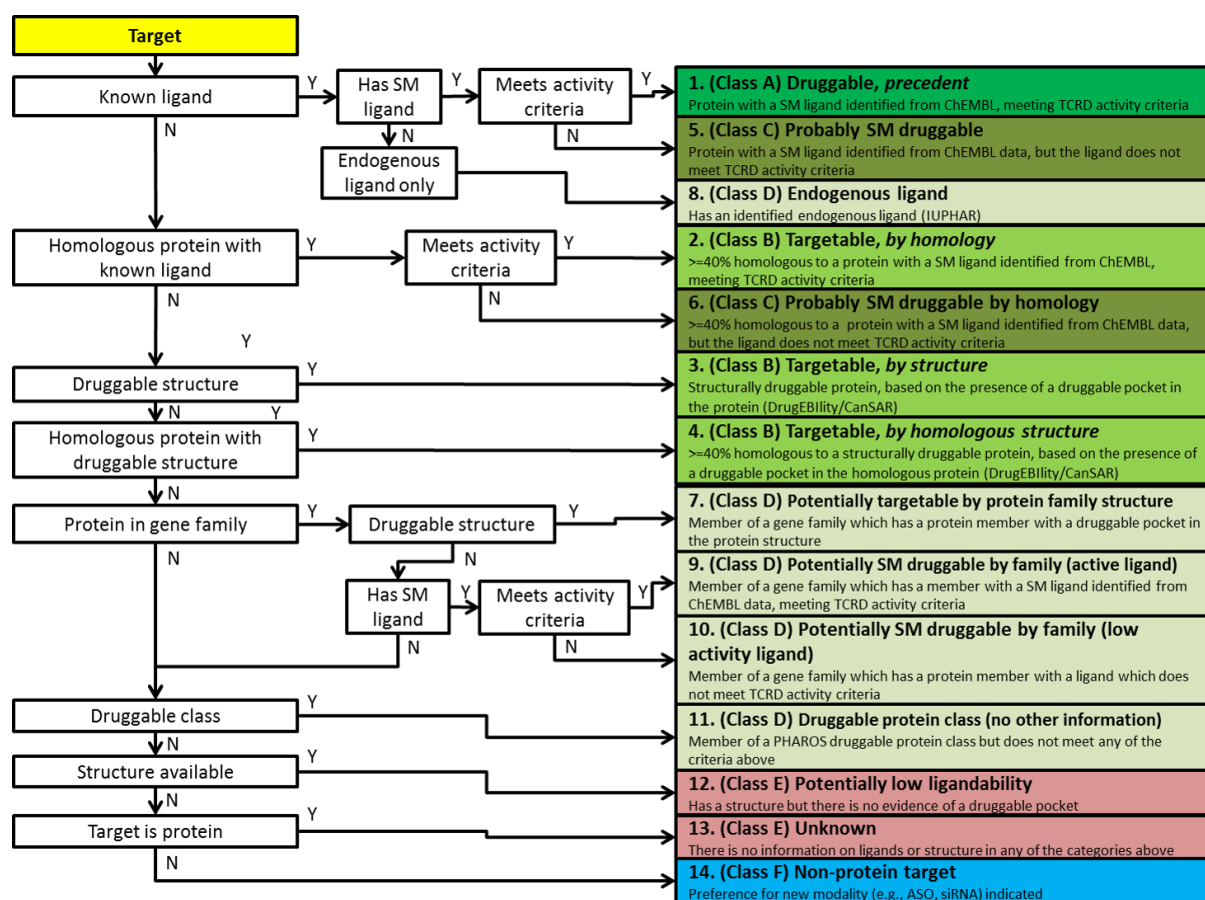

**Supp. Fig 1 Small-molecule druggability scoring decision tree.** TractaViewer uses data mined from multiple sources to assess the extent to which a candidate drug target is likely to be suitable for small-molecule drug development. We assign the highest scores to targets that already have successfully marketed drugs or small-molecule compounds that meet activity criteria defined by Target Central Resource Database, or have homologs meeting those criteria; lower scores to genes with high-resolution 3D structures possessing indications of druggability or with structurally druggable homologs; and the lowest scores to genes likely to be unsuitable for drug development or where public information is insufficient to assess druggability. This decision tree is based on a similar process used in CanSAR.
